# Supplementary material for: Location of Ge and extra-framework species in the zeolite ITQ-24
Source: Royal Society of Chemistry journal article supplement (doi:10.1039/c4dt03831b), 2015-01-01
Supplement: c4dt03831b2.pdf [file c4dt03831b2.pdf]

## Supporting Information for

### **Location of Ge and extra-framework species in the zeolite**

#### **ITQ-24**

A. B. Pinar<sup>a\*</sup>, L. B. McCusker<sup>a</sup>, C. Baerlocher<sup>a</sup>, J. Schmidt<sup>b</sup>, S. J. Hwang<sup>b</sup>, M. E. Davis<sup>b</sup>  
and S. I. Zones<sup>c</sup>

Table 1S. Deconvolution of the  $^{19}\text{F}$  MAS NMR spectrum of as-made Ge-ITQ-24.

| Chem. Shift (ppm) | Line width (Hz) | CSA *(ppm) | $\eta_{\text{CSA}}$ * | Rel. Intensity ratio |
|-------------------|-----------------|------------|-----------------------|----------------------|
| -10.15            | 2820.0          | 50         | 0.5                   | 44.52                |
| -20.90            | 1640.3          | 55         | 0.5                   | 10.96                |
| -51.00            | 2820.0          | 60         | 1.0                   | 16.88                |
| -85.60            | 3760.0          | 50         | 1.0                   | 7.74                 |
| -116.51           | 846.0           |            |                       | 4.87                 |
| -120.24           | 855.4           |            |                       | 10.31                |
| -126.25           | 846.0           |            |                       | 4.72                 |

\*Note: The CSA and  $\eta$  values extracted from the spectral fit contain sizeable error because of the poor quality of the spectrum and some background signal, so they should be interpreted with caution.

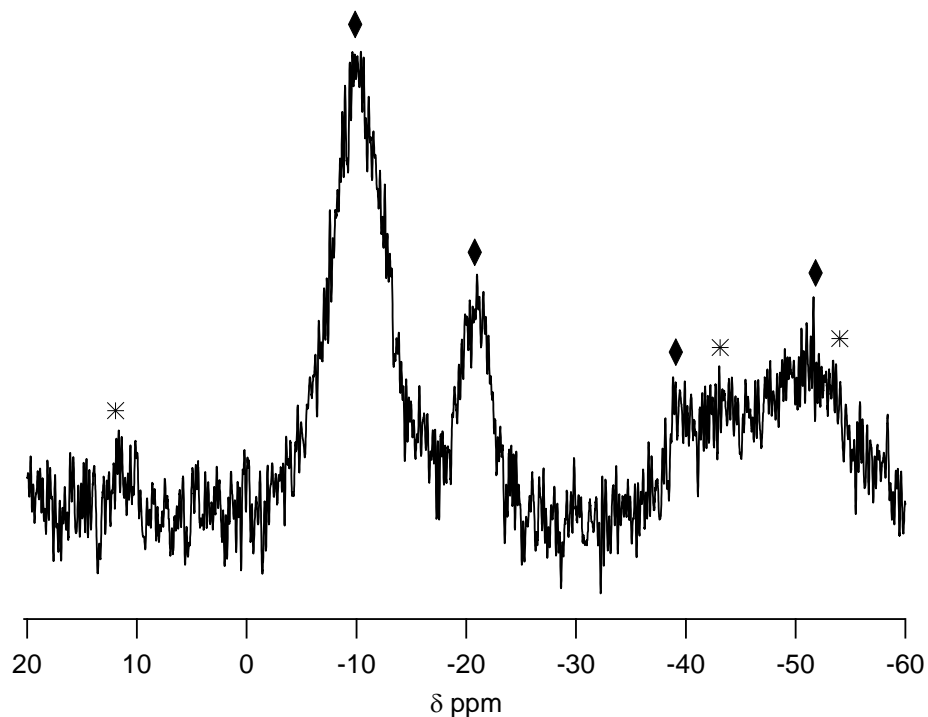

**Figure 1S.**  $^{19}\text{F}$  MAS NMR (15 kHz) spectrum of as-made Ge-ITQ-24. Diamonds denote resonances and \* denote spinning side bands (identified by spinning at both 15 and 13 kHz).

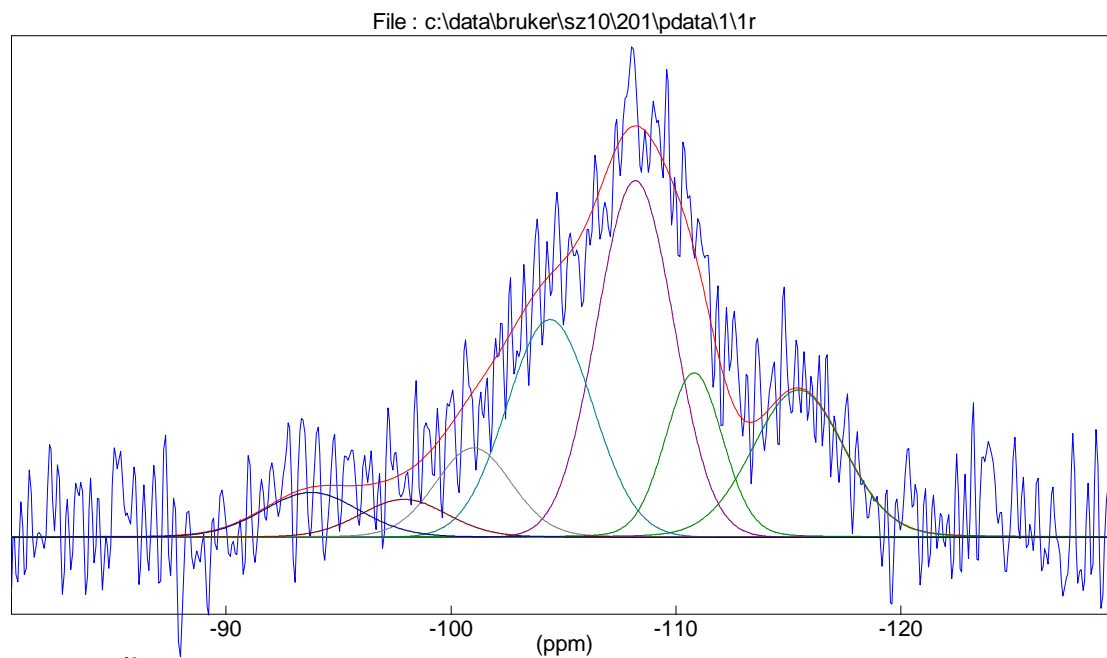

**Figure 2S.**  $^{29}\text{Si}$  NMR spectrum of as-made Ge-ITQ-24.
